# Supplementary figures and images for: MUL1, an Immune Chemokine-Related Gene, Regulates Glioma Cell Proliferation and Migration: Insights from Functional and Mechanistic Studies
Source: Research Square preprint supplement (doi:10.21203/rs.3.rs-7604400/v1), 2025-10-30

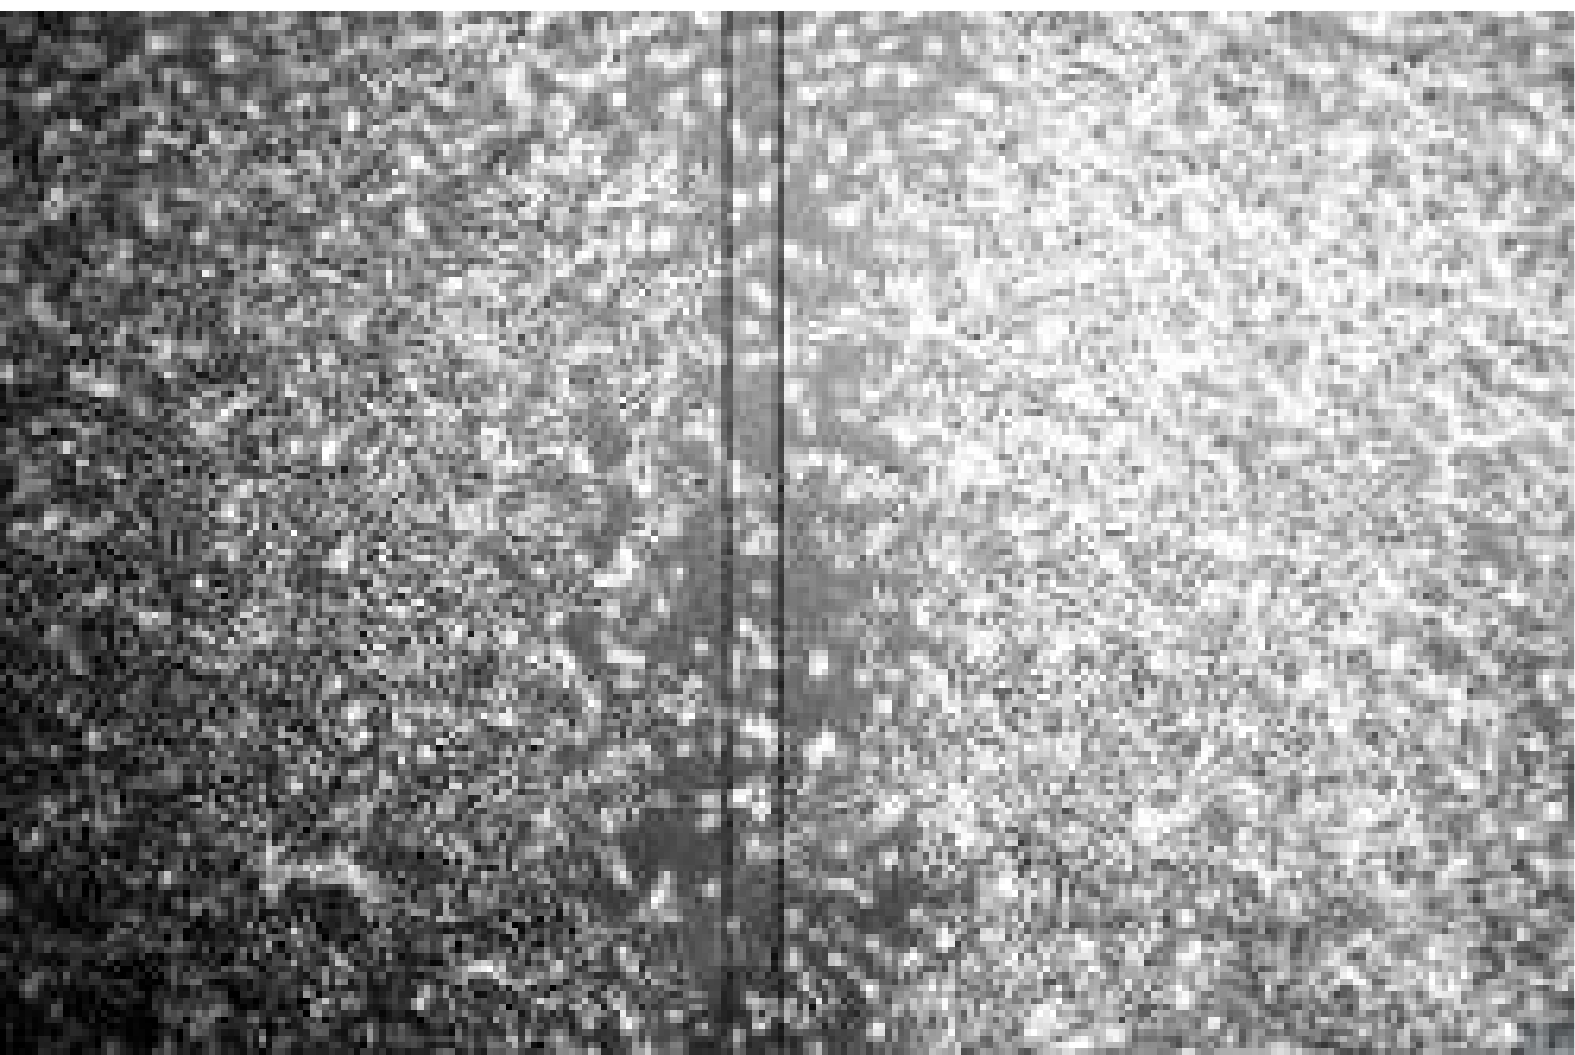

Supplement: Supplementary file 1 [file bf10c212399fb70c7fd44076.pdf]
